# Supplementary material
Source: Springer Nature journal article supplement (https://www.springermedizin.de/resource/supplementary/12884_2012_540_MOESM1_ESM.pdf/9458010)

**A**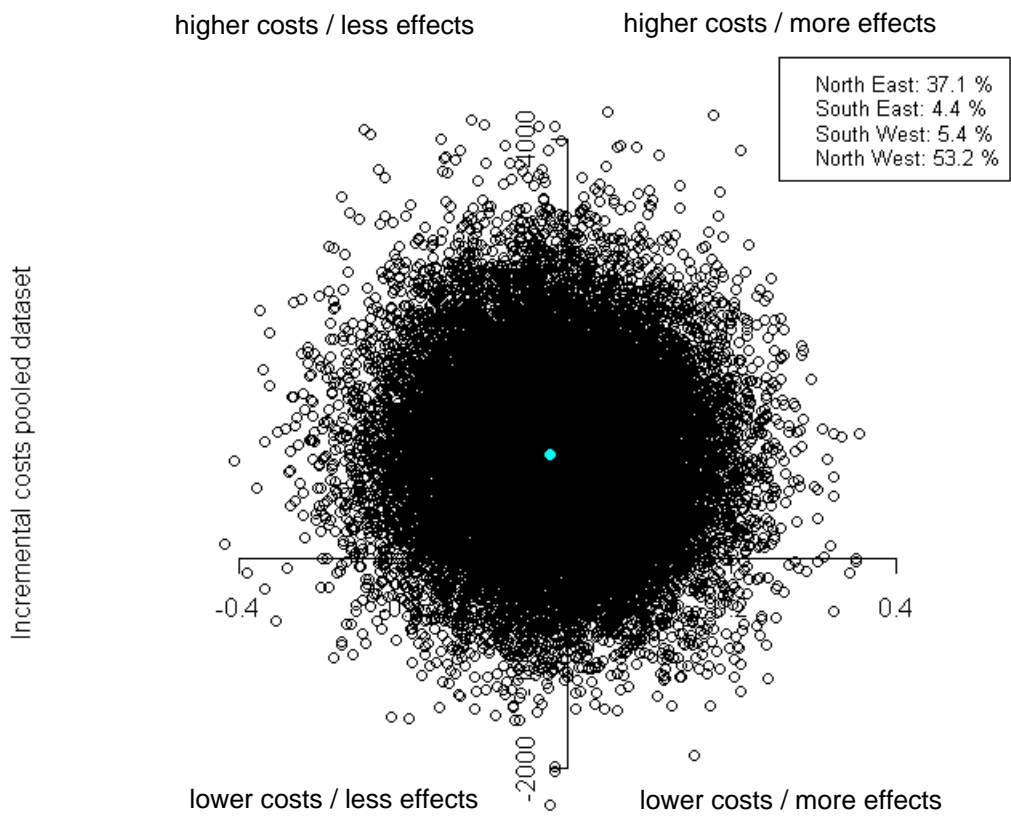

Incremental effects pooled datasets

**B**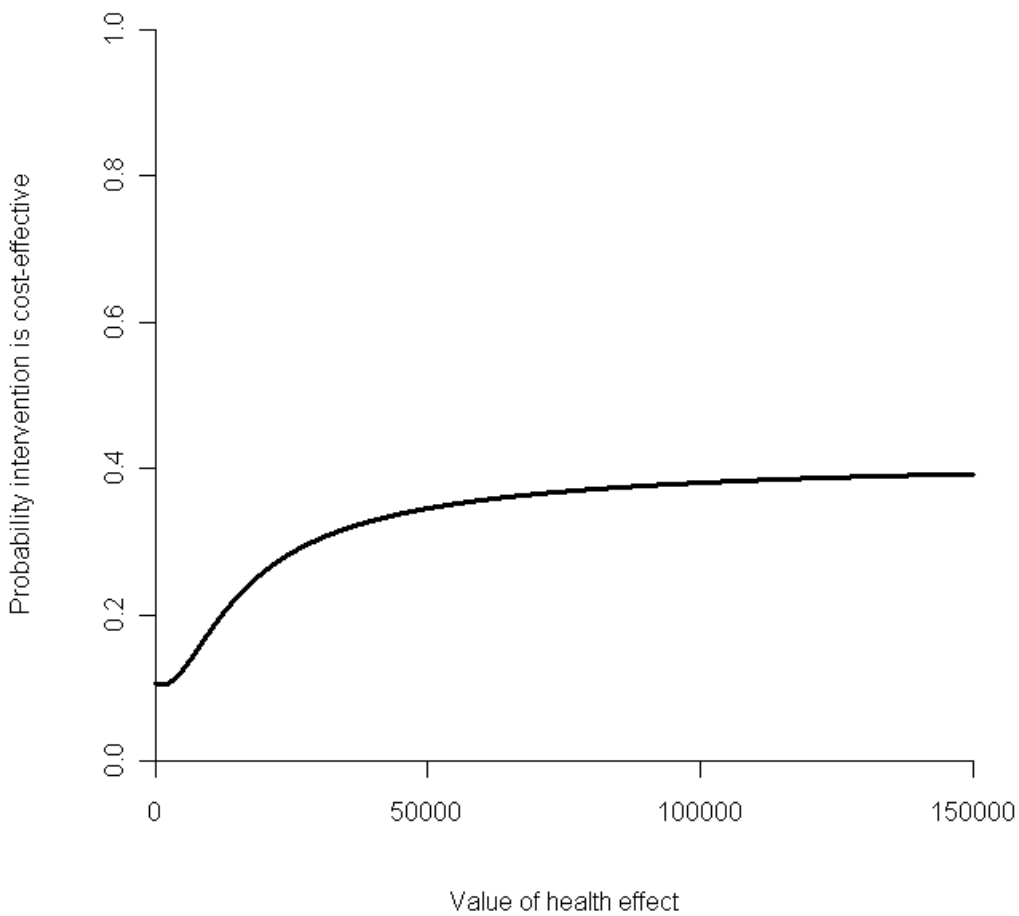

Supplement: MOESM1 [file 9458010]
